# Supplementary material
Source: HighWire-hosted journal article supplement (http://www.cmaj.ca/highwire/filestream/58323/field_highwire_adjunct_files/1/use-birnie-online_appendix_2.pdf)
Supplement: use-birnie-online_appendix_2.pdf [file use-birnie-online_appendix_2.pdf]

**Appendix 2: International Classification of Diseases (ICD, ninth and tenth revision) codes used in the study to define comorbidities**

| Comorbidity               | ICD-9,<br>ICD-9-CCP           | ICD-9-CM,<br>ICD-9-CCP          | ICD-10-CA,<br>ICD-10-CCI      |
|---------------------------|-------------------------------|---------------------------------|-------------------------------|
| Liver failure             | 570-572                       | 570-572                         | K70-K76                       |
| Renal failure             | 584, 585                      | 584, 585                        | N17-N19                       |
|                           | 51.95                         | 39.95                           | 1.PZ.21.HQ-BR                 |
|                           | 66.98                         | 54.98                           | 1.PZ.21.HP-D4                 |
| Heart failure             | 425                           | 425                             | I42, I25.5                    |
|                           | 428                           | 428                             | I50                           |
| Acute myocardial ischemia | 411                           | 411.1, 411.8,<br>411.81, 411.89 | I24.0, I24.8,<br>I24.9, I20.0 |
| Neurologic failure        | 348                           | 348                             | G93.1                         |
|                           | 3.16                          | 89.14                           | 2.AN.24                       |
| Neoplasms                 | 140-165<br>170-176<br>179-208 | 140-165<br>170-176<br>179-208   | C00-C97                       |

Note: CCP = Canadian Classification of Procedures, CM = clinical modification, CA = Canadian enhancement, CCI = Canadian Classification of Health Interventions.
